# Supplementary material
Source: PubMed Central journal article supplement (PMC5457913)
Supplement: NIHMS828641-supplement-Supplementary_Material_S1-S5.pdf [file NIHMS828641-supplement-Supplementary_Material_S1-S5.pdf]

## Supporting Material S1

**SIEMENS MAGNETOM Avanto\_fit syngo MR D13B**

\\USER\PengHu\Jiaxin\MOLLI\_Study\MOLLI\_5(3)3\_FA35  
 TA:8.1 s PAT:2 Voxel size:1.8×1.8×8.0 mm Rel. SNR:1.00 :tft

**Properties**

|                                 |        |
|---------------------------------|--------|
| Prio Recon                      | Off    |
| Load to viewer                  | On     |
| Inline movie                    | Off    |
| Auto store images               | On     |
| Load to stamp segments          | Off    |
| Load images to graphic segments | Off    |
| Auto open inline display        | Off    |
| Wait for user to start          | On     |
| Start measurements              | single |

**Routine**

|                     |                      |
|---------------------|----------------------|
| Nr. of slice groups | 1                    |
| Slices              | 1                    |
| Dist. factor        | 20 %                 |
| Position            | L68.1 P5.6 F3.7 mm   |
| Orientation         | S > C31.9 > T18.6    |
| Phase enc. dir.     | A >> P               |
| AutoAlign           | ---                  |
| Phase oversampling  | 0 %                  |
| FoV read            | 340 mm               |
| FoV phase           | 80.2 %               |
| Slice thickness     | 8.0 mm               |
| TR                  | 740.00 ms            |
| TE                  | 1.05 ms              |
| Averages            | 1                    |
| Concatenations      | 1                    |
| Filter              | Distortion Corr.(2D) |
| Coil elements       | BO1-3;SP1-3          |

**Contrast**

|                   |                   |
|-------------------|-------------------|
| Magn. preparation | Non-sel. IR T1map |
| TI                | 200 ms            |
| Flip angle        | 35 deg            |
| Fat suppr.        | None              |
| Averaging mode    | Short term        |
| Measurements      | 1                 |
| Reconstruction    | Magn./Phase       |
| Multiple series   | Off               |

## Supporting Material S1

## Resolution

|                       |            |
|-----------------------|------------|
| Base resolution       | 192        |
| Phase resolution      | 81 %       |
| Phase partial Fourier | 6/8        |
| Trajectory            | Cartesian  |
| Interpolation         | Off        |
| PAT mode              | GRAPPA     |
| Accel. factor PE      | 2          |
| Ref. lines PE         | 24         |
| Reference scan mode   | Integrated |
| Image Filter          | Off        |
| Distortion Corr.      | On         |
| Mode                  | 2D         |
| Unfiltered images     | Off        |
| Prescan Normalize     | Off        |
| Normalize             | Off        |
| B1 filter             | Off        |
| Raw filter            | Off        |
| Elliptical filter     | Off        |
| POCS                  | Off        |

## Geometry

|                     |                     |
|---------------------|---------------------|
| Nr. of slice groups | 1                   |
| Slices              | 1                   |
| Dist. factor        | 20 %                |
| Position            | L68.1 P5.6 F10.7 mm |
| Phase enc. dir.     | A >> P              |
| Phase oversampling  | 0 %                 |
| Multi-slice mode    | Sequential          |
| Series              | Interleaved         |
| Nr. of sat. regions | 0                   |
| Position mode       | Offcenter-Shift     |
| Fat suppr.          | None                |
| Special sat.        | None                |
| Special sat.        | None                |
| Set-n-Go Protocol   | Off                 |
| Table position      | P                   |
| Inline Composing    | Off                 |

## Supporting Material S1

## System

|                          |                     |
|--------------------------|---------------------|
| Body                     | Off                 |
| BO1                      | On                  |
| BO2                      | On                  |
| BO3                      | On                  |
| SP5                      | Off                 |
| SP6                      | Off                 |
| SP7                      | Off                 |
| SP8                      | Off                 |
| SP1                      | On                  |
| SP2                      | On                  |
| SP3                      | On                  |
| SP4                      | Off                 |
| Position mode            | Offcenter-Shift     |
| Positioning mode         | REF                 |
| Table position           | F                   |
| Table position           | 0 mm                |
| MSMA                     | S - C - T           |
| Sagittal                 | R >> L              |
| Coronal                  | A >> P              |
| Transversal              | F >> H              |
| Save uncombined          | Off                 |
| Coil Combine Mode        | Adaptive Combine    |
| AutoAlign                | ---                 |
| Coil Select Mode         | Default             |
| Shim mode                | Cardiac             |
| Adjust with body coil    | Off                 |
| Confirm freq. adjustment | Off                 |
| Assume Dominant Fat      | Off                 |
| Assume Silicone          | Off                 |
| Adjustment Tolerance     | Auto                |
| ? Ref. amplitude 1H      | 0.000 V             |
| ! Position               | L48.1 A27.2 F9.6 mm |
| ! Rotation               | 14.499991 deg       |
| ! F >> H                 | 126 mm              |
| ! A >> P                 | 120 mm              |
| ! R >> L                 | 123 mm              |
| Frequency 1H             | 63.661924 MHz       |
| Correction factor        | 1                   |
| PrepExc 1H               | 201.384 V           |
| Gain                     | High                |
| Table position           | 7 mm                |

## Supporting Material S1

|                       |                   |
|-----------------------|-------------------|
| Img. Scale. Cor.      | 1.000             |
| <b>Physio</b>         |                   |
| 1st Signal/Mode       | ECG/Trigger       |
| Average cycle         | No Signal ms      |
| Captured cycle        | -not set-         |
| Acquisition window    | 740 ms            |
| Trigger pulse         | 1                 |
| Trigger delay         | 0 ms              |
| Segments              | 74                |
| Adaptive Triggering   | Off               |
| Tagging               | None              |
| Magn. preparation     | Non-sel. IR T1map |
| TI                    | 200 ms            |
| Dark blood            | Off               |
| Phases                | 1                 |
| Cine                  | Off               |
| Trajectory            | Cartesian         |
| Inline Evaluation     | Off               |
| Resp. control         | Off               |
| Dummy heartbeats      | 0                 |
| <b>Inline</b>         |                   |
| Inline Composing      | Off               |
| Distortion correction | Off               |

## Supporting Material S1

## Sequence

|                       |             |
|-----------------------|-------------|
| Introduction          | Off         |
| Dimension             | 2D          |
| Averaging mode        | Short term  |
| Multi-slice mode      | Sequential  |
| Reordering            | Linear      |
| Asymmetric echo       | Weak        |
| Contrasts             | 1           |
| Bandwidth             | 1002 Hz/Px  |
| Optimization          | Min. TE     |
| Allowed delay         | 0 s         |
| Echo spacing          | 2.5 ms      |
| Sequence type         | Trufi       |
| Define                | Shots       |
| Shots per slice       | 1           |
| Trufi delta freq.     | 0 Hz        |
| RF pulse type         | Fast        |
| Gradient mode         | Fast        |
| Excitation            | Slice-sel.  |
| Flip angle mode       | Constant    |
| Cine                  | Off         |
| Parameter Map Type    | T1 Map      |
| Inversion pulse Type  | Short(2ms)  |
| No. of preps          | 2           |
| TI start              | 120 ms      |
| TI increment          | 80 ms       |
| Motion correction     | On          |
| Goodness of fit map   | Off         |
| Synth MagIR and PSIR  | Off         |
| Acquisition Type      | Normal      |
| No. of bSSFP Ramps    | 10          |
| TX/RX delta frequency | 0 Hz        |
| TX Nucleus            | None        |
| TX delta frequency    | 0 Hz        |
| Coil elements         | BO1-3;SP1-3 |
| Acquisition duration  | 0 ms        |
| Mode                  | Off         |

## Supporting Material S1

**BOLD**

|                      |     |
|----------------------|-----|
| Subtract             | Off |
| StdDev               | Off |
| MIP-Sag              | Off |
| MIP-Cor              | Off |
| MIP-Tra              | Off |
| MIP-Time             | Off |
| Save original images | On  |
| Distortion Corr.     | On  |
| Mode                 | 2D  |
| Unfiltered images    | Off |
| Contrasts            | 1   |
| Save original images | On  |

## Supporting Material S2

**SIEMENS MAGNETOM Avanto\_fit syngo MR D13B**

\\USER\PengHu\Jiaxin\T1\_T2Map\_IR\_SE\ir\_se\_T50\_TR10000  
 TA:21:32 Voxel size:1.8×1.8×8.0 mm Rel. SNR:1.00 :ir

**Properties**

|                                 |        |
|---------------------------------|--------|
| Prio Recon                      | Off    |
| Load to viewer                  | On     |
| Inline movie                    | Off    |
| Auto store images               | On     |
| Load to stamp segments          | Off    |
| Load images to graphic segments | Off    |
| Auto open inline display        | Off    |
| Wait for user to start          | Off    |
| Start measurements              | single |

**Routine**

|                     |                     |
|---------------------|---------------------|
| Nr. of slice groups | 1                   |
| Slices              | 1                   |
| Dist. factor        | 50 %                |
| Position            | L47.1 P56.5 H3.5 mm |
| Orientation         | Coronal             |
| Phase enc. dir.     | R >> L              |
| AutoAlign           | ---                 |
| Phase oversampling  | 0 %                 |
| FoV read            | 230 mm              |
| FoV phase           | 100.0 %             |
| Slice thickness     | 8.0 mm              |
| TR                  | 10000.0 ms          |
| TE                  | 4.6 ms              |
| Averages            | 1                   |
| Concatenations      | 1                   |
| Filter              | None                |
| Coil elements       | BO1-3;SP1-3         |

## Supporting Material S2

## Contrast

|                   |                  |
|-------------------|------------------|
| MTC               | Off              |
| Magn. preparation | Slice-sel. IR    |
| TI                | 50 ms            |
| Flip angle        | 90 deg           |
| Fat suppr.        | None             |
| Water suppr.      | None             |
| Averaging mode    | Short term       |
| Measurements      | 1                |
| Reconstruction    | Magnitude        |
| Multiple series   | Each measurement |

## Resolution

|                       |       |
|-----------------------|-------|
| Base resolution       | 128   |
| Phase resolution      | 100 % |
| Phase partial Fourier | Off   |
| Interpolation         | Off   |
| Image Filter          | Off   |
| Distortion Corr.      | Off   |
| Prescan Normalize     | Off   |
| Normalize             | Off   |
| B1 filter             | Off   |
| Raw filter            | Off   |
| Elliptical filter     | Off   |

## Geometry

|                     |                     |
|---------------------|---------------------|
| Nr. of slice groups | 1                   |
| Slices              | 1                   |
| Dist. factor        | 50 %                |
| Position            | L47.1 P56.5 H3.5 mm |
| Phase enc. dir.     | R >> L              |
| Phase oversampling  | 0 %                 |
| Multi-slice mode    | Interleaved         |
| Series              | Interleaved         |
| Nr. of sat. regions | 0                   |
| Position mode       | Offcenter-Shift     |
| Fat suppr.          | None                |
| Water suppr.        | None                |
| Special sat.        | None                |
| Special sat.        | None                |
| Set-n-Go Protocol   | Off                 |
| Table position      | P                   |
| Inline Composing    | Off                 |



## Supporting Material S2

## System

|                          |                  |
|--------------------------|------------------|
| Body                     | Off              |
| BO1                      | On               |
| BO2                      | On               |
| BO3                      | On               |
| SP5                      | Off              |
| SP6                      | Off              |
| SP7                      | Off              |
| SP8                      | Off              |
| SP1                      | On               |
| SP2                      | On               |
| SP3                      | On               |
| SP4                      | Off              |
| Position mode            | Offcenter-Shift  |
| Positioning mode         | FIX              |
| Table position           | H                |
| Table position           | 0 mm             |
| MSMA                     | S - C - T        |
| Sagittal                 | R >> L           |
| Coronal                  | A >> P           |
| Transversal              | F >> H           |
| Save uncombined          | Off              |
| Coil Combine Mode        | Adaptive Combine |
| AutoAlign                | ---              |
| Coil Select Mode         | Default          |
| Shim mode                | Tune up          |
| Adjust with body coil    | Off              |
| Confirm freq. adjustment | Off              |
| Assume Dominant Fat      | Off              |
| Assume Silicone          | Off              |
| Adjustment Tolerance     | Auto             |
| ? Ref. amplitude 1H      | 0.000 V          |
| Position                 | Isocenter        |
| Rotation                 | 0.00 deg         |
| R >> L                   | 350 mm           |
| A >> P                   | 263 mm           |
| F >> H                   | 350 mm           |
| Frequency 1H             | 63.661924 MHz    |
| Correction factor        | 1                |
| this pIRsel 1H           | 369.543 V        |
| Gain                     | High             |
| Table position           | 0 mm             |

## Supporting Material S2

|                 |                       |               |
|-----------------|-----------------------|---------------|
|                 | Img. Scale. Cor.      | 1.000         |
| <b>Physio</b>   |                       |               |
|                 | 1st Signal/Mode       | None          |
|                 | Magn. preparation     | Slice-sel. IR |
|                 | TI                    | 50 ms         |
|                 | Dark blood            | Off           |
| <b>Inline</b>   |                       |               |
|                 | Inline Composing      | Off           |
|                 | Distortion correction | Off           |
| <b>Sequence</b> |                       |               |
|                 | Introduction          | On            |
|                 | Averaging mode        | Short term    |
|                 | Multi-slice mode      | Interleaved   |
|                 | Asymmetric echo       | Off           |
|                 | Contrasts             | 1             |
|                 | Bandwidth             | 399 Hz/Px     |
|                 | Allowed delay         | 0 s           |
|                 | RF pulse type         | Fast          |
|                 | Gradient mode         | Fast          |
|                 | TX/RX delta frequency | 0 Hz          |
|                 | TX Nucleus            | None          |
|                 | TX delta frequency    | 0 Hz          |
|                 | Coil elements         | BO1-3;SP1-3   |
|                 | Acquisition duration  | 0 ms          |
|                 | Mode                  | Off           |
| <b>BOLD</b>     |                       |               |
|                 | Subtract              | Off           |
|                 | StdDev                | Off           |
|                 | MIP-Sag               | Off           |
|                 | MIP-Cor               | Off           |
|                 | MIP-Tra               | Off           |
|                 | MIP-Time              | Off           |
|                 | Save original images  | On            |
|                 | Distortion Corr.      | Off           |
|                 | Contrasts             | 1             |
|                 | Save original images  | On            |

## Supporting Material S3

**SIEMENS MAGNETOM Avanto\_fit syngo MR D13B**

\\USER\PengHu\Jiaxin\T1\_T2Map\_IR\_SE\se\_TE5\_TR10000  
 TA:21:32 Voxel size:1.8×1.8×8.0 mm Rel. SNR:1.00 :se

**Properties**

|                                 |        |
|---------------------------------|--------|
| Prio Recon                      | Off    |
| Load to viewer                  | On     |
| Inline movie                    | Off    |
| Auto store images               | On     |
| Load to stamp segments          | Off    |
| Load images to graphic segments | Off    |
| Auto open inline display        | Off    |
| Wait for user to start          | Off    |
| Start measurements              | single |

**Routine**

|                     |                     |
|---------------------|---------------------|
| Nr. of slice groups | 1                   |
| Slices              | 1                   |
| Dist. factor        | 50 %                |
| Position            | L47.1 P56.5 H3.5 mm |
| Orientation         | Coronal             |
| Phase enc. dir.     | R >> L              |
| AutoAlign           | ---                 |
| Phase oversampling  | 0 %                 |
| FoV read            | 230 mm              |
| FoV phase           | 100.0 %             |
| Slice thickness     | 8.0 mm              |
| TR                  | 10000.0 ms          |
| TE                  | 5.0 ms              |
| Averages            | 1                   |
| Concatenations      | 1                   |
| Filter              | None                |
| Coil elements       | BO1-3;SP1-3         |

## Supporting Material S3

## Contrast

|                   |                  |
|-------------------|------------------|
| MTC               | Off              |
| Magn. preparation | None             |
| Flip angle        | 90 deg           |
| Fat suppr.        | None             |
| Water suppr.      | None             |
| Averaging mode    | Short term       |
| Measurements      | 1                |
| Reconstruction    | Magnitude        |
| Multiple series   | Each measurement |

## Resolution

|                       |       |
|-----------------------|-------|
| Base resolution       | 128   |
| Phase resolution      | 100 % |
| Phase partial Fourier | Off   |
| Interpolation         | Off   |
| Image Filter          | Off   |
| Distortion Corr.      | Off   |
| Prescan Normalize     | Off   |
| Normalize             | Off   |
| B1 filter             | Off   |
| Raw filter            | Off   |
| Elliptical filter     | Off   |

## Geometry

|                     |                     |
|---------------------|---------------------|
| Nr. of slice groups | 1                   |
| Slices              | 1                   |
| Dist. factor        | 50 %                |
| Position            | L47.1 P56.5 H3.5 mm |
| Phase enc. dir.     | R >> L              |
| Phase oversampling  | 0 %                 |
| Multi-slice mode    | Interleaved         |
| Series              | Interleaved         |
| Nr. of sat. regions | 0                   |
| Position mode       | Offcenter-Shift     |
| Fat suppr.          | None                |
| Water suppr.        | None                |
| Special sat.        | None                |
| Special sat.        | None                |
| Set-n-Go Protocol   | Off                 |
| Table position      | P                   |
| Inline Composing    | Off                 |

## Supporting Material S3

## System

|                          |                  |
|--------------------------|------------------|
| Body                     | Off              |
| BO1                      | On               |
| BO2                      | On               |
| BO3                      | On               |
| SP5                      | Off              |
| SP6                      | Off              |
| SP7                      | Off              |
| SP8                      | Off              |
| SP1                      | On               |
| SP2                      | On               |
| SP3                      | On               |
| SP4                      | Off              |
| Position mode            | Offcenter-Shift  |
| Positioning mode         | FIX              |
| Table position           | H                |
| Table position           | 0 mm             |
| MSMA                     | S - C - T        |
| Sagittal                 | R >> L           |
| Coronal                  | A >> P           |
| Transversal              | F >> H           |
| Save uncombined          | Off              |
| Coil Combine Mode        | Adaptive Combine |
| AutoAlign                | ---              |
| Coil Select Mode         | Default          |
| Shim mode                | Tune up          |
| Adjust with body coil    | Off              |
| Confirm freq. adjustment | Off              |
| Assume Dominant Fat      | Off              |
| Assume Silicone          | Off              |
| Adjustment Tolerance     | Auto             |
| ? Ref. amplitude 1H      | 0.000 V          |
| Position                 | Isocenter        |
| Rotation                 | 0.00 deg         |
| R >> L                   | 350 mm           |
| A >> P                   | 263 mm           |
| F >> H                   | 350 mm           |
| Frequency 1H             | 63.661924 MHz    |
| Correction factor        | 1                |
| VExcit 1H                | 474.908 V        |
| Gain                     | High             |
| Table position           | 0 mm             |

## Supporting Material S3

|                 |                       |             |
|-----------------|-----------------------|-------------|
|                 | Img. Scale. Cor.      | 1.000       |
| <b>Physio</b>   |                       |             |
|                 | 1st Signal/Mode       | None        |
|                 | Magn. preparation     | None        |
|                 | Dark blood            | Off         |
| <b>Inline</b>   |                       |             |
|                 | Inline Composing      | Off         |
|                 | Distortion correction | Off         |
| <b>Sequence</b> |                       |             |
|                 | Introduction          | On          |
|                 | Averaging mode        | Short term  |
|                 | Multi-slice mode      | Interleaved |
|                 | Asymmetric echo       | Off         |
|                 | Contrasts             | 1           |
|                 | Bandwidth             | 399 Hz/Px   |
|                 | Allowed delay         | 0 s         |
|                 | RF pulse type         | Fast        |
|                 | Gradient mode         | Fast        |
|                 | TX/RX delta frequency | 0 Hz        |
|                 | TX Nucleus            | None        |
|                 | TX delta frequency    | 0 Hz        |
|                 | Coil elements         | BO1-3;SP1-3 |
|                 | Acquisition duration  | 0 ms        |
|                 | Mode                  | Off         |
| <b>BOLD</b>     |                       |             |
|                 | Subtract              | Off         |
|                 | StdDev                | Off         |
|                 | MIP-Sag               | Off         |
|                 | MIP-Cor               | Off         |
|                 | MIP-Tra               | Off         |
|                 | MIP-Time              | Off         |
|                 | Save original images  | On          |
|                 | Distortion Corr.      | Off         |
|                 | Contrasts             | 1           |
|                 | Save original images  | On          |

## Supporting Material S4

Supporting material S4: Influence of magnetization transfer (MT) effect and inversion factor on T1 estimations

### Methods

To evaluate the influence of MT effect on measured inversion factor and the influence of inversion factor on T1 estimations, the “MOLLI+M0” sequence and the MOLLI 5(3)3 sequence as described in the main manuscript were simulated at FA=35°, HR=60 bpm. The MT simulation approach for the MOLLI sequence was the same as described in (24). The tissue parameters used in the MT simulation were the same as that of cardiac muscle used in (24), i.e. T1f = 1175 ms, T2f = 54.4 ms, T1r = 1000 ms, T2r = 8.5 us, F=0.07, k<sub>f</sub> = 4.1 s<sup>-1</sup>. The sequence parameters were the same as the actual sequence parameters used in this work, including simulation of the adiabatic inversion pulse and excitation pulse.

After the “MOLLI+M0” sequence without and with MT effect was simulated, the BLEESPC 4-parameter fit was applied to the simulated signal to calculate the inversion factor without and with MT effect, respectively. After the MOLLI 5(3)3 sequence without and with MT effect was simulated, the four T1 estimation algorithms, BLESSPC, InSiL, IG fit and original fit were applied to calculate T1 values assuming a fixed inversion factor from 0.88 – 1.00 (0.01 increment).

### Results

The inversion factor ( $\delta$ ) estimated using our BLESSPC 4-parameter fit based on the simulated non-MT “MOLLI+M0” data was 0.97, which was similar to the average  $\delta$  of 0.96 measured in our phantom study. It was 0.89 when the MT effect was included in our simulated “MOLLI+M0” data, which was similar to the average  $\delta$  of 0.88 measured in our in vivo study. Therefore, MT appears to be a major cause for the greatly reduced inversion factor in vivo compared to in phantom experiments.

The T1 estimation results using different inversion factors and algorithms for the MOLLI 5(3)3 sequence without and with MT effect were shown in Figure S1. The results showed that all the four methods are sensitive to MT effect and choice of inversion factor. However, using the  $\delta$  measured using “MOLLI+M0” helped to reduce T1 estimation error, e.g. using the measured inversion factor  $\delta$  considering MT effect ( $\delta=0.89$ ) the T1

## Supporting Material S4

estimation error was reduced to -0.8% using BLESSPC for the MOLLI 5(3)3 sequence considering MT effect.

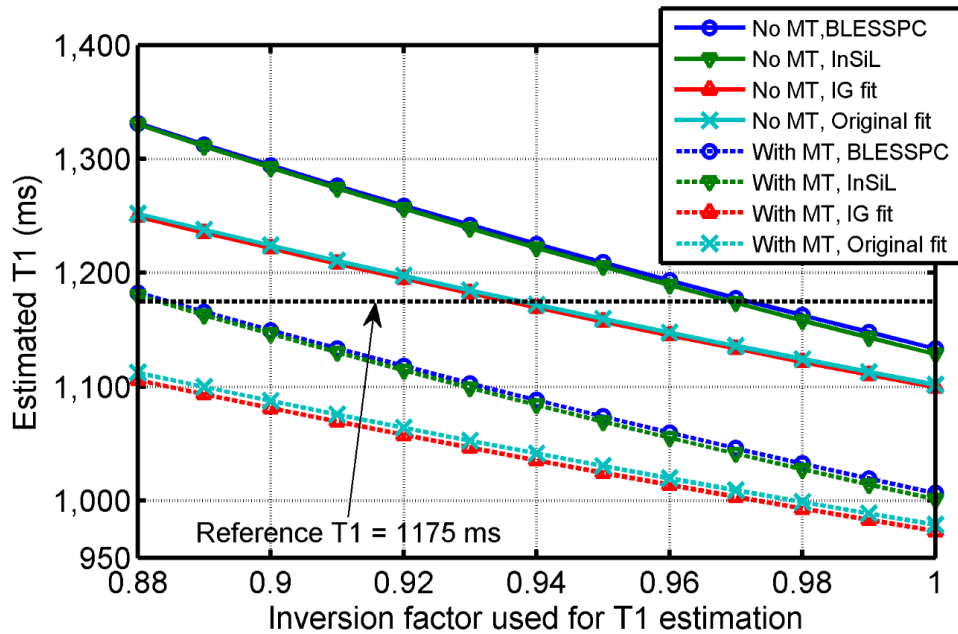

Figure S1: Simulation – comparison of estimated T1 values using BLESSPC, InSiL, IG fit and original fit for the MOLLI 5(3)3 sequence with and without MT effect over different inversion factors. All the four methods are sensitive to MT and choice of inversion factor for T1 estimations. Using the measured inversion factor considering MT effect ( $\delta=0.89$ ) reduced the T1 estimation error due to the MT effect.



## Supporting Material S5

### Supporting material S5: Simulation of ShMOLLI pulse sequence

Additional simulations were performed to compare BLESSPC and InSiL T1 estimation with ShMOLLI's T1 estimation algorithm (conditional 3-parameter exponential fitting) in terms of accuracy and precision for the ShMOLLI sequence. Specifically, the simulations were performed with 5(1)1(1)1 acquisition scheme, FA = 35°, T2 = 50 ms, HR = 60 bpm and T1 values varied from 220 ms, 400 ms to 1800 ms (200 ms increments); T1 estimation precision were estimated using Monte-Carlo simulation with 65,536 trials by adding the amount of Gaussian noise described in the main manuscript. The other simulated sequence parameters were the same as described in the simulation section in the main manuscript. Figure S2 shows the simulation results of T1 estimation accuracy and precision at T1 values ranges from 220 ms to 1800ms using BLESSPC, InSiL and ShMOLLI's conditional fit using the 5(1)1(1)1 acquisition scheme.

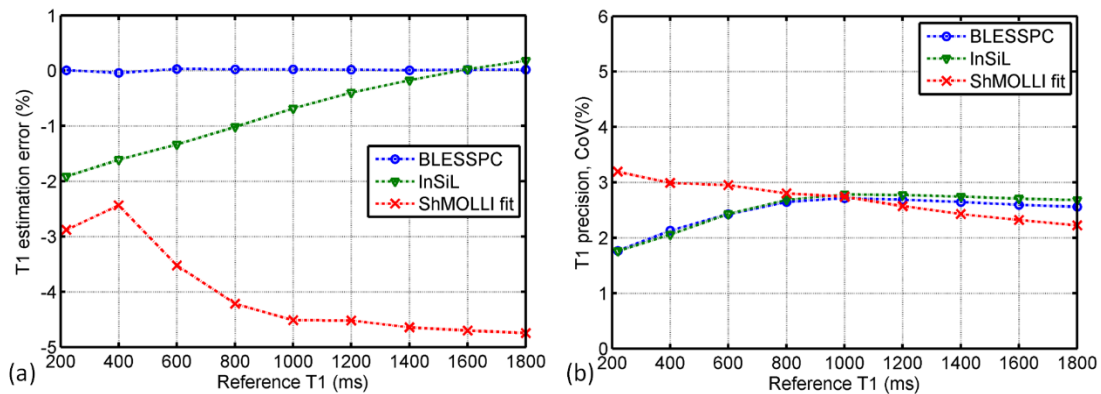

Figure S2: Simulation - comparison of BLESSPC, InSiL and ShMOLLI fit for the ShMOLLI pulse sequence in terms of T1 estimation accuracy (a) and precision (b) for T1 range from 220 ms - 1800 ms. Overall, BLESSPC and InSiL were more accurate than ShMOLLI fit. BLESSPC was slightly better than InSiL. The ShMOLLI fit had superior precision over the other two methods for T1 > 1000 ms, while for T1 < 1000 ms, BLESSPC and InSiL were more precise.
